# Supplementary material for: Desulfurization by oxidation combined with extraction using acidic room-temperature ionic liquids
Source: Royal Society of Chemistry journal article supplement (doi:10.1039/c0gc00745e), 2011-01-01
Supplement: c0gc00745e.pdf [file c0gc00745e.pdf]

## Supporting Information

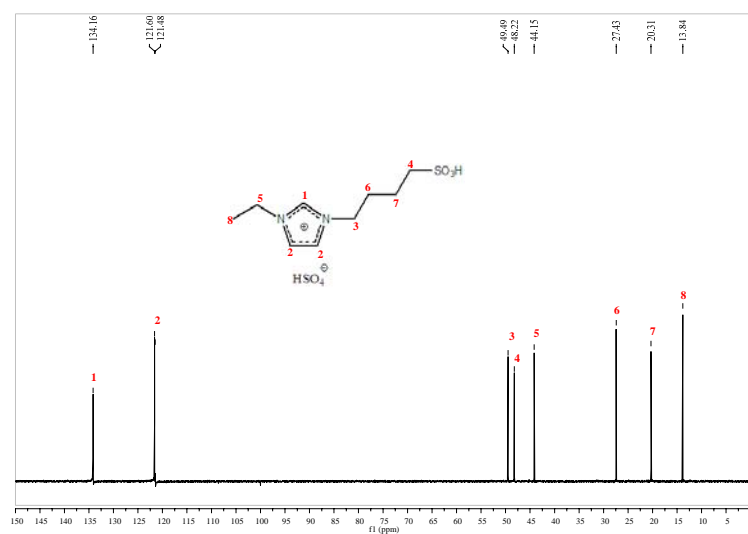

Fig. S1 <sup>13</sup>C NMR spectrum of [EimC<sub>4</sub>SO<sub>3</sub>H]HSO<sub>4</sub>

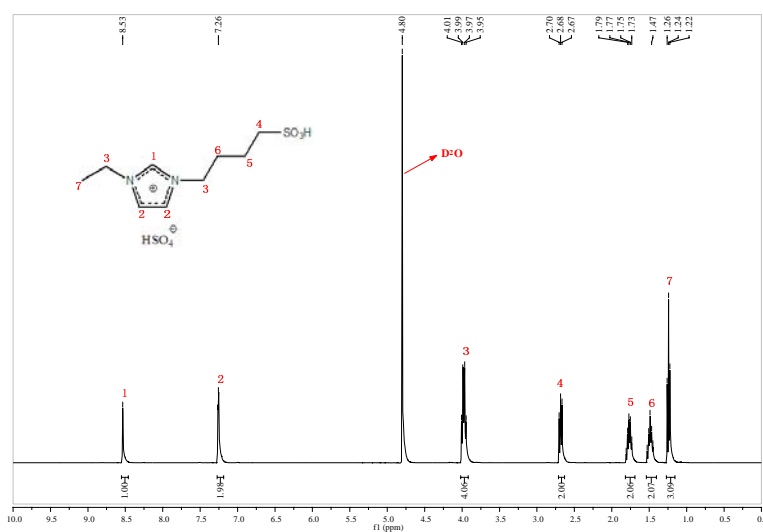

Fig. S2 <sup>1</sup>H NMR spectrum of [EimC<sub>4</sub>SO<sub>3</sub>H]HSO<sub>4</sub>

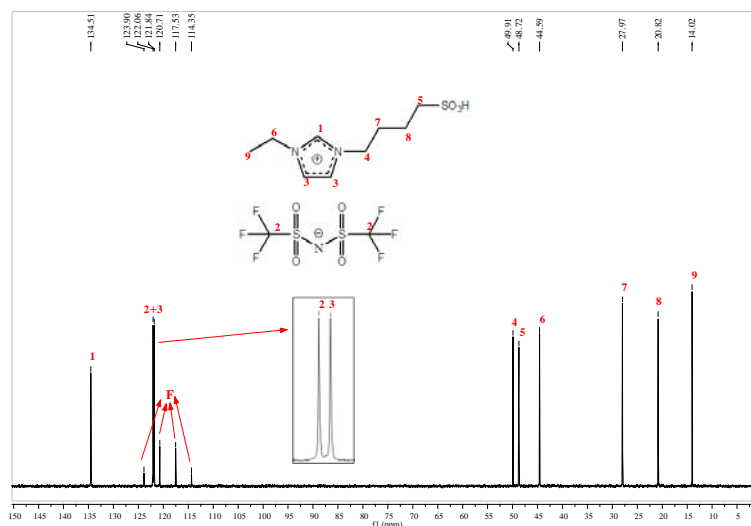

Fig. S3 <sup>13</sup>C NMR spectrum of [EimC<sub>4</sub>SO<sub>3</sub>H]<sup>+</sup>NTf<sub>2</sub><sup>-</sup>

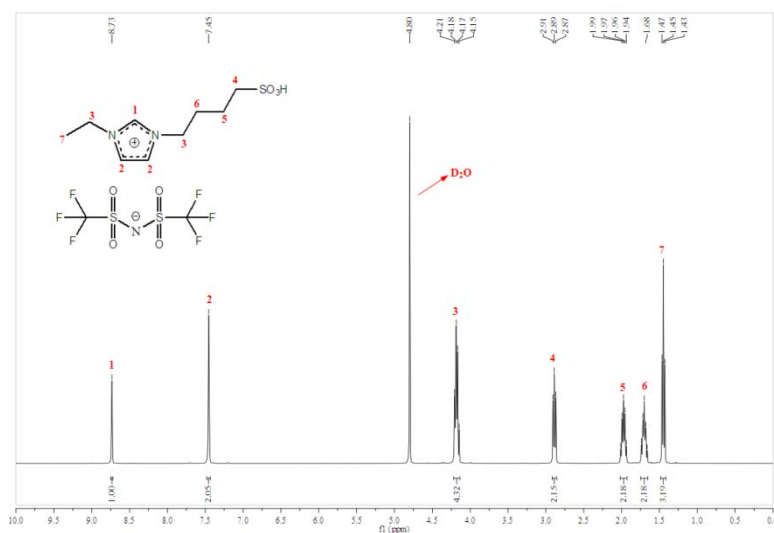

Fig. S4 <sup>1</sup>H NMR spectrum of [EimC<sub>4</sub>SO<sub>3</sub>H]<sup>+</sup>NTf<sub>2</sub><sup>-</sup>

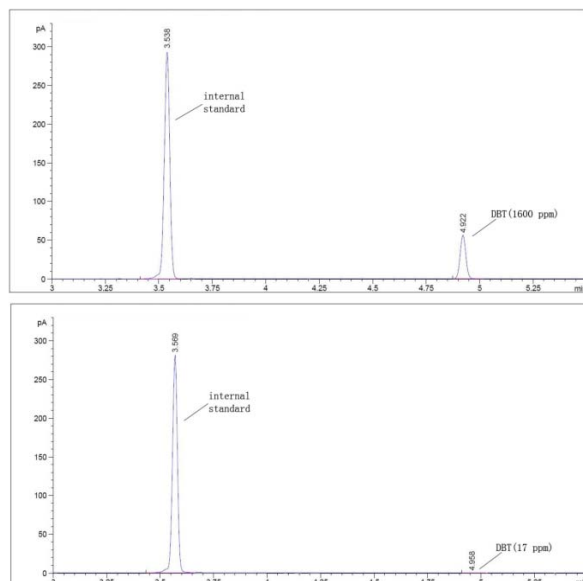

Fig. S5 The GC of DBT before extraction and after extraction

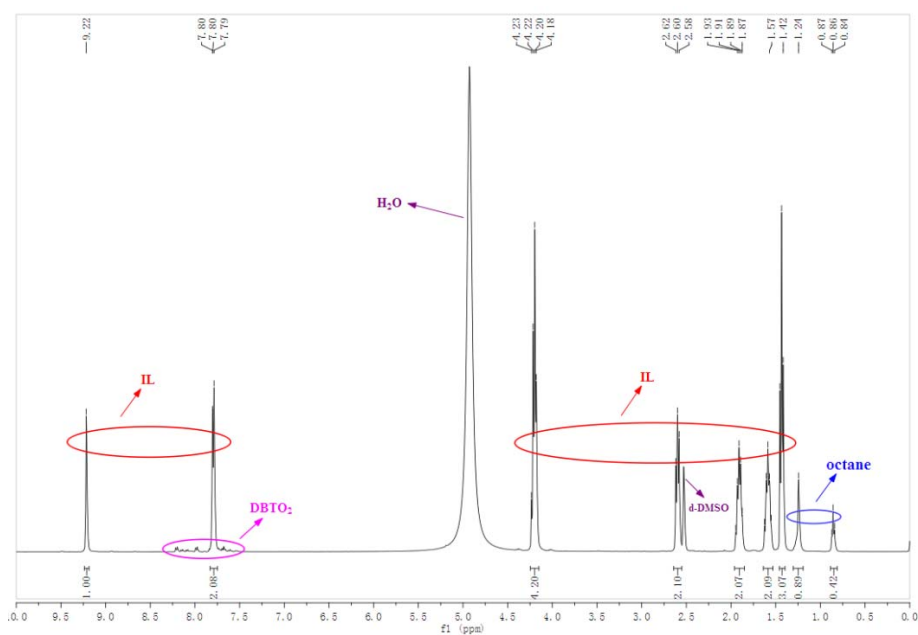

Fig. S6 <sup>1</sup>H NMR spectrum of [EimC<sub>4</sub>SO<sub>3</sub>H]NTf<sub>2</sub> after extraction
